# Supplementary material
Source: PubMed Central journal article supplement (PMC5960310)
Supplement: pnas.201721868SI.pdf [file pnas.201721868SI.pdf]

# Supporting Information

Liang et al. 10.1073/pnas.1721868115

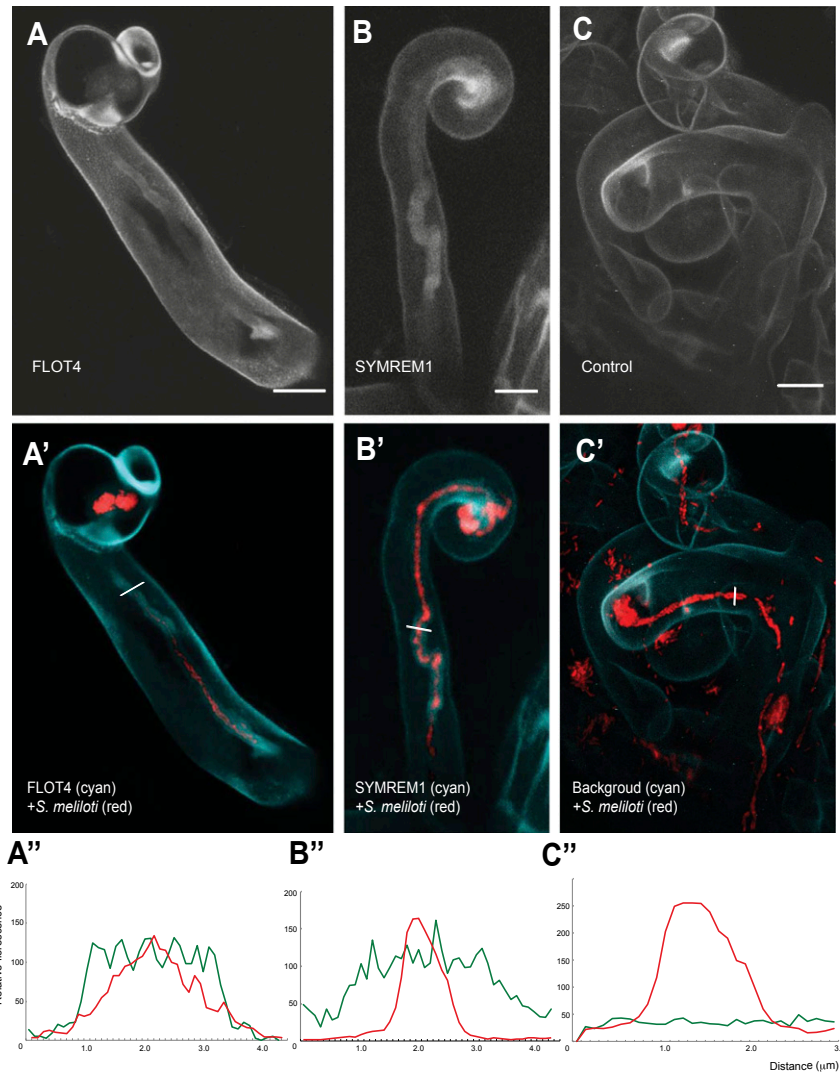

**Fig. S1.** Comparison of fluorescent background levels around ITs in the immunofluorescence assay. (A and B) Immunofluorescence targeting FLOT4-GFP (A–A') and GFP-SYMREM1 (B–B'), both expressed from their endogenous promoters. (C–C') As a control, the same immunofluorescence protocol was applied to nontransformed but infected root hairs from the same batch of samples. A, B, and C show the GFP channel; A', B', and C' show the merged channel with *S. melliloti* 2011 (mCherry) infection. The lines in A', B', and C' indicate transects used for the relative fluorescence analysis displayed below. A'', B'', and C'' indicate the fluorescent gray value, in which red represents the value of the mCherry channel and green represents the GFP channel. A and A' and B and B' are identical to Fig. 1. (Scale bars: 10 μm.)

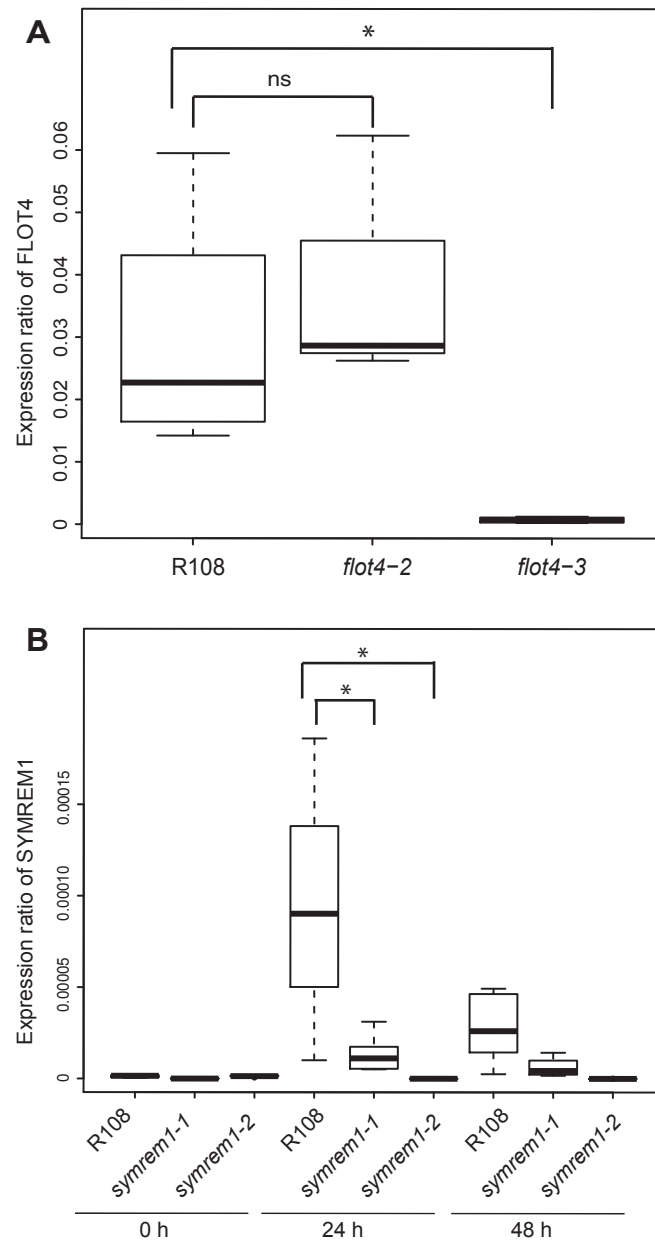

**Fig. S2.** Determining transcript and protein levels in *Tnt1* insertion lines. *(A)* *FLOT4* transcript levels in *flot4-2* and *flot4-3* insertion lines and WT R108 plants. *(B)* *SYMREM1* transcript level before inoculation and at 24 h and 48 h postinoculation in *symrem1-1* and *symrem1-2* mutant lines. Quantitative RT-PCR (qRT-PCR) was performed on cDNA obtained from roots, with five biological replicates. The graphs represent the  $\Delta\Delta C_t$  values obtained by qRT-PCR in relative to ubiquitin. \* $P < 0.05$  obtained from the Student *t* test in *A* and from the Dunnett multiple-comparison test in *B*. ns, not significant.

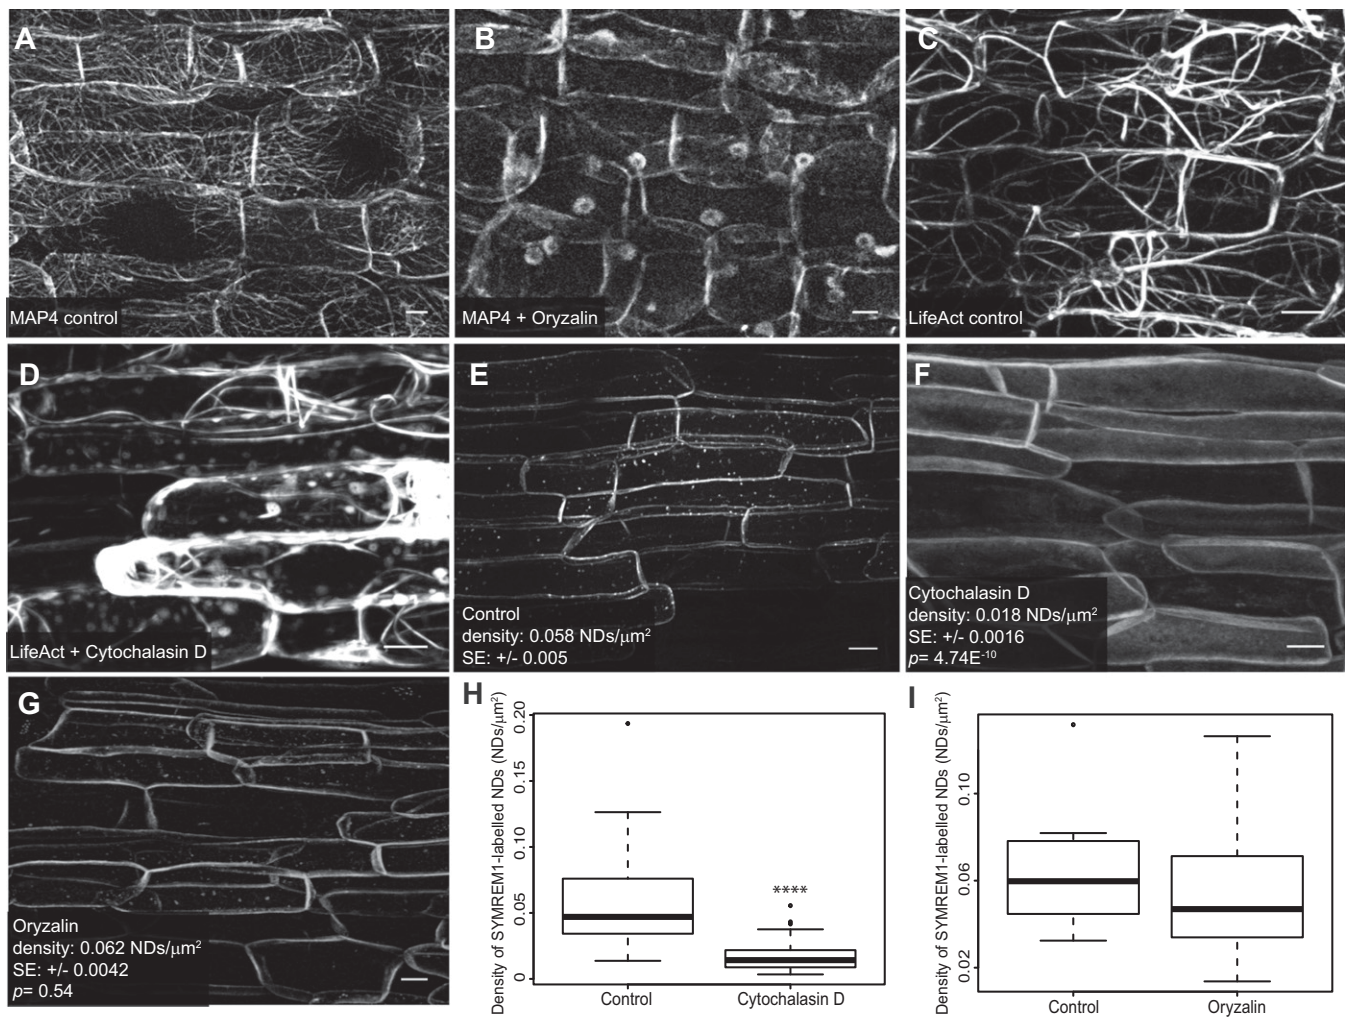

**Fig. S3.** Recruitment of SYMREM1 into nanodomains (NDs) is actin-dependent. (A–D) The efficiency of drug application to destabilize microtubules (A and B) and actin (C and D) was tested by applying oryzalin (B) and cytochalasin D (D) on roots expressing fluorophore-tagged MICROTUBULE-ASSOCIATED PROTEIN 4 (MAP4) (A and B) or Lifeact (C and D). (E–I) The density of YFP-SYMREM1-labeled nanodomains was significantly higher in control roots (E and H) compared with roots treated with cytochalasin D (F and H), while depolymerizing microtubules (G and I) did not change YFP-SYMREM1 localization. Quantitative image analysis was performed on all samples as indicated below the individual panels. \*\*\*\* $P < 0.0001$  obtained from Student *t* tests. (Scale bars: 10  $\mu\text{m}$ .)

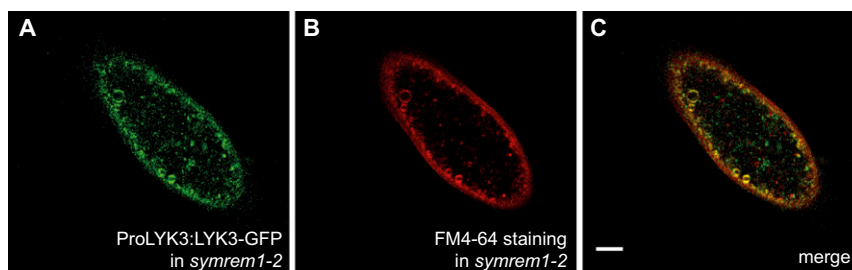

**Fig. S4.** Activated LYK3 receptor localizes to endosomes in *symrem1-2* mutants on prolonged rhizobial inoculation. (A) ProLYK3:LYK3-GFP was expressed in *symrem1-2* mutant roots and imaged in root hairs at 2 dpi with *S. meliloti*. (B and C) To test the plasma membrane origin of the observed vesicles, samples were counterstained with FM4-64 (B), and images were subsequently merged (C). (D) Fluorescence intensity plot of a representative transect (position indicated in C) showing a high degree of colocalization in these structures. (Scale bar: 5  $\mu\text{m}$ .)

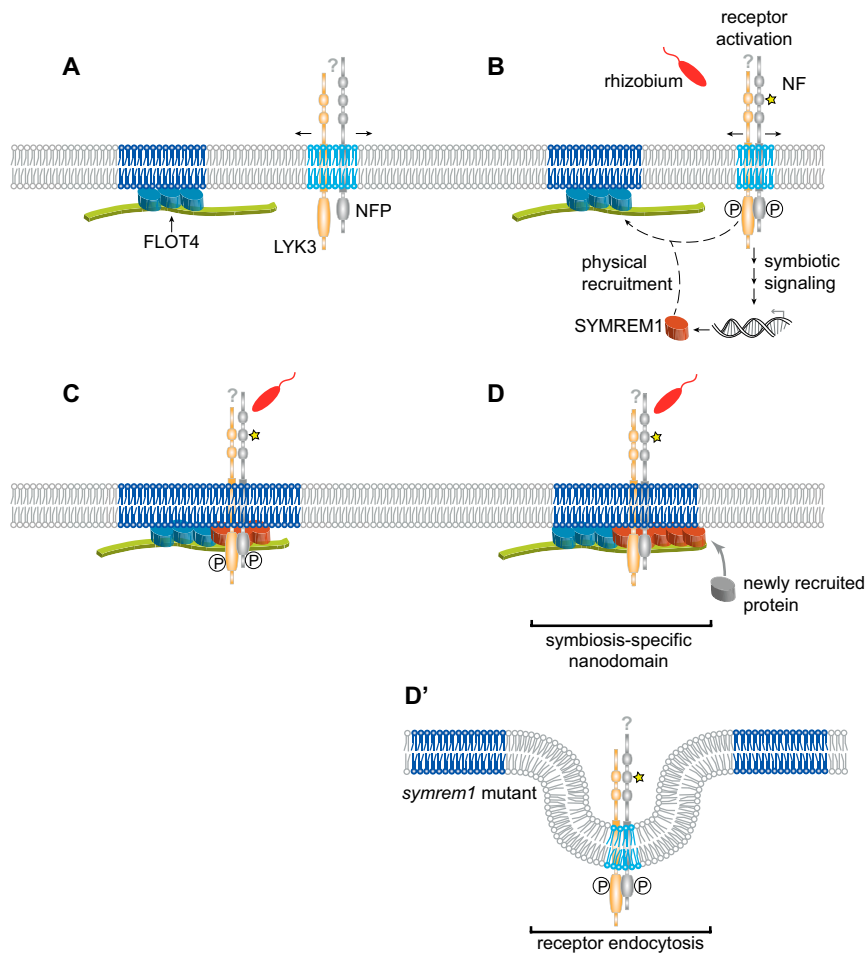

**Fig. S5.** Proposed model for nanodomain assembly. (A) Constitutively expressed FLOT4 (turquoise) forms a primary nanodomain scaffold that is unable to recruit LYK3 in the absence of SYMREM1. (B) Nod factor (NF) perception by NFP (gray) and LYK3 (orange) occurs in mobile nanodomains and results in the activation of a symbiosis-specific signaling cascade that leads to the expression of *SYMREM1* (red). (C) Due to its ability to directly bind LYK3 (1), SYMREM1 actively recruits the receptor into the FLOT4 nanodomain. (D) Phosphorylation of SYMREM1 by LYK3 may trigger remorin oligomerization, which generates new docking sites for proteins required for rhizobial infection (hypothetical). (D') In *symrem1* mutants, LYK3 is destabilized and endocytosed on rhizobial inoculation.

1. Lefebvre B, et al. (2010) A remorin protein interacts with symbiotic receptors and regulates bacterial infection. *Proc Natl Acad Sci USA* 107:2343–2348.

**Table S1.** Quantification of LYK3 mobility

| Mobility | Uninoculated | <i>S. meliloti</i> (2 dpi) | ProUbi:YFP-SYMREM1 |
|----------|--------------|----------------------------|--------------------|
| >180 s   | 1/20         | 9/9                        | 30/49              |
| 60–180 s | —            | —                          | 16/49              |
| <30 s    | 19/20        | —                          | 3/49               |

Values are frequencies of categories detected in a set of observed root hairs ( $n = 9-49$ ). Pixel dwell times of LYK3-labeled nanodomains were categorized as >180 s, 60–180 s, and <30 s.

**Table S2. Primers used in the study**

| Primer     | Sequence (5'-3')               | Used for                      | References or referenced ID |
|------------|--------------------------------|-------------------------------|-----------------------------|
| FLOT2-F1   | AGTCAGAGTCCCTCGCCAGTACAAT      | Genotyping                    | Medtr3g106420               |
| FLOT2-R1   | CAAGAAATACCAAGCACGTAAGACATAAT  | Genotyping                    | Medtr3g106420               |
| FLOT2-F2   | GAGAGCTGGAGAGGGTGAGAA          | Genotyping                    | Medtr3g106420               |
| FLOT2-R2   | GACTTGCAAAAACACTACAATGTGACGTTA | Genotyping                    | Medtr3g106420               |
| FLOT2-F3/4 | AGAAACAGAAAGAGACTGAAGCAATTC    | Genotyping                    | Medtr3g106420               |
| FLOT2-R3   | CCAGCAACTTCTTTCATACCCAT        | Genotyping                    | Medtr3g106420               |
| FLOT2-R4   | CATCATCCTAATCAAGAGCTTTTCTCA    | Genotyping                    | Medtr3g106420               |
| FLOT4-F    | CCTTCCATACCATACACCTTACACCAT    | Genotyping                    | Medtr3g106430               |
| FLOT4-R    | CACCCCACTATTATCACCACCATTAGT    | Genotyping                    | Medtr3g106430               |
| TNT1-F     | GTAGAGAATAGGTAAGGTGCT          | Genotyping                    | (1)                         |
| TNT1-R     | TGTAGCACCGAGATACGGTAATTAACAAGA | Genotyping                    | (1)                         |
| TNT1-R1    | TGTAGCACCGAGATACGGTAATTAACAAGA | Genotyping                    | (1)                         |
| SYMREM1-F  | CCCAATATATACATGTCCTC           | Genotyping                    | Medtr8g097320               |
| SYMREM1-R  | CCAAAACAAGCAAGCTAATGAA         | Genotyping                    | Medtr8g097320               |
| Ubi-F      | TTGTGTGTTGAATCCTAAGCA          | Housekeeping gene for qRT-PCR | (2)                         |
| Ubi-R      | CAAGACCCATGCAACAAGTTC          | Housekeeping gene for qRT-PCR | (2)                         |
| qFLOT4-F   | TACACTGCTGTAAGGGATTTTC         | qRT-PCR                       | Medtr3g106430               |
| qFLOT4-R   | CTTTCATCGCACCTTCACC            | qRT-PCR                       | Medtr3g106430               |
| qSYMREM1-F | GTGGGAGGATGATAAGAAAGC          | qRT-PCR                       | Medtr8g097320               |
| qSYMREM1-R | CTGATAGCCACGAGTACGAAA          | qRT-PCR                       | Medtr8g097320               |

1. Tadege M, et al. (2008) Large-scale insertional mutagenesis using the Tnt1 retrotransposon in the model legume *Medicago truncatula*. *Plant J* 54:335–347.
2. Satgé C, et al. (2016) Reprogramming of DNA methylation is critical for nodule development in *Medicago truncatula*. *Nat Plants* 2:16166.

**Table S3. Gene constructs used in this study**

| Construct cassette                            | Method           | Backbone     | Used for                                  | GenBank accession no. or reference |
|-----------------------------------------------|------------------|--------------|-------------------------------------------|------------------------------------|
| ProSYMREM1-GW                                 | Gateway          | pUB-GW(HYG)  | Cloning                                   | JQ061257                           |
| ProSYMREM1:NLS-2xGFP                          | Golden Gate LII  | L2βF1-2      | Expression pattern                        | JQ061257                           |
| ProFLOT4:NLS-2xGFP                            | Golden Gate LII  | L2βF1-2      | Expression pattern                        | CT009553                           |
| ProSYMREM1:GFP-SYMREM1                        | Golden Gate LII  | L2βF1-2      | LIII construct module                     | JQ061257                           |
| ProFLOT4:FLOT4-GFP                            | Golden Gate LII  | L2βF1-2      | LIII construct module                     | GU224281                           |
| ProUbi:GFP-SYMREM1                            | Golden Gate LII  | L2βR1-2      | Nanodomain quantification                 | JQ061257                           |
| ProUbi:FLOT4-GFP                              | Golden Gate LII  | L2βR1-2      | Nanodomain quantification                 | GU224281                           |
| ProUbi:NLS-2xCerulean                         | Golden Gate LII  | L2βR 5–6     | LIII construct module as prescreen marker | (1)                                |
| ProSYMREM1:GFP-SYMREM1//ProUbi:NLS-2xCerulean | Golden Gate LIII | L3βF A-B     | Localization                              | JQ061257                           |
| ProFLOT4:FLOT4-GFP//ProUbi:NLS-2xCerulean     | Golden Gate LIII | L3βF A-B     | Localization                              | GU224281                           |
| ProUbi:FLOT4:RNAi                             | Golden Gate LII  | L2βRNAi F1-2 | FLOT4 gene silencing                      | GU224281                           |
| ProUbi:YFP-MAP4                               | Golden Gate LII  | L2βF1-2      | Microtubule marker                        | M72414                             |
| ProUbi:YFP-Lifeact                            | Golden Gate LII  | L2βF1-2      | Actin marker                              | (2)                                |

1. Binder A, et al. (2014) A modular plasmid assembly kit for multigene expression, gene silencing and silencing rescue in plants. *PLoS One* 9:e88218.
2. Bücherl CA, et al. (2017) Plant immune and growth receptors share common signalling components but localise to distinct plasma membrane nanodomains. *eLife* 6:e25114.
